# Supplementary material for: Visible light induced efficient hydrogen production through semiconductor–conductor–semiconductor (S–C–S) interfaces formed between g-C3N4 and rGO/Fe2O3 core–shell composites
Source: Royal Society of Chemistry journal article supplement (doi:10.1039/c8cy01248b), 2018-01-01
Supplement: c8cy01248b1.pdf [file c8cy01248b1.pdf]

## Electronic Supplementary Information (ESI)

### Visible light induced efficient hydrogen production through semiconductor-conductor-semiconductor (S-C-S) interface formed between g-C<sub>3</sub>N<sub>4</sub> and rGO/Fe<sub>2</sub>O<sub>3</sub> core-shell

Nithya Thangavel <sup>a</sup>, Sankeerthana Bellamkonda <sup>b</sup>, Abraham Daniel Arulraj <sup>a</sup>, G. RangaRao <sup>b</sup>,  
Bernardshaw Neppolian, <sup>a,\*</sup>

<sup>a</sup> SRM Research Institute and Department of Chemistry, SRM Institute of Science & Technology, Kattankulathur, Chennai - 603203, Tamil Nadu, India.

<sup>b</sup> Department of Chemistry, Indian Institute of Technology Madras, Chennai - 600036, Tamil Nadu, India.

\*E-mail: [neppolian.b@res.srmuniv.ac.in](mailto:neppolian.b@res.srmuniv.ac.in)

### Content

1. **Figure S1.** XRD patterns of GO and rGO
2. **Figure S2.** Raman Spectra of GO and rGO
3. **Figure S3.** XPS survey scan spectra of g-C<sub>3</sub>N<sub>4</sub>/rGO/Fe<sub>2</sub>O<sub>3</sub>
4. **Figure S4.** Transient photocurrent measurement of g-C<sub>3</sub>N<sub>4</sub>, g-C<sub>3</sub>N<sub>4</sub>/rGO, g-C<sub>3</sub>N<sub>4</sub>/rGO/Fe<sub>2</sub>O<sub>3</sub>, rGO/Fe<sub>2</sub>O<sub>3</sub>
5. **Figure S5.** Mott-Schottky plot for (A) g-C<sub>3</sub>N<sub>4</sub> (B) Fe<sub>2</sub>O<sub>3</sub>
6. **Figure S6.** Photocatalytic activity of optimization of rGO on g-C<sub>3</sub>N<sub>4</sub>
7. **Table 1.** Comparison of H<sub>2</sub> production efficiency of reported Pt loaded g-C<sub>3</sub>N<sub>4</sub> based composites and without Pt loaded g-C<sub>3</sub>N<sub>4</sub> composite catalysts (this work).

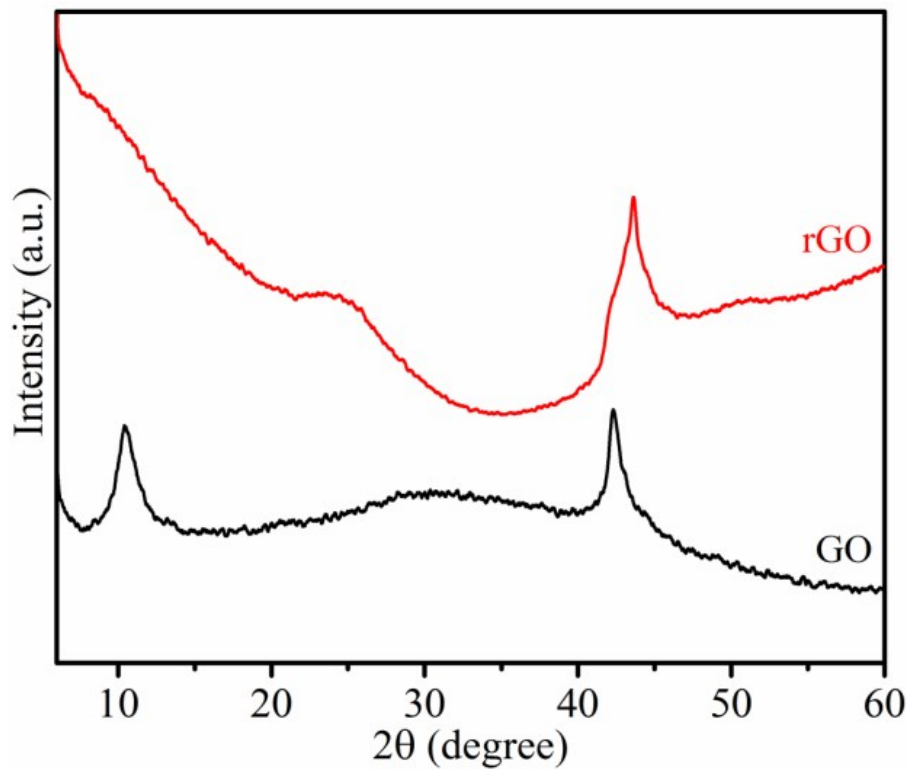

**Figure S1.** XRD patterns of GO and rGO

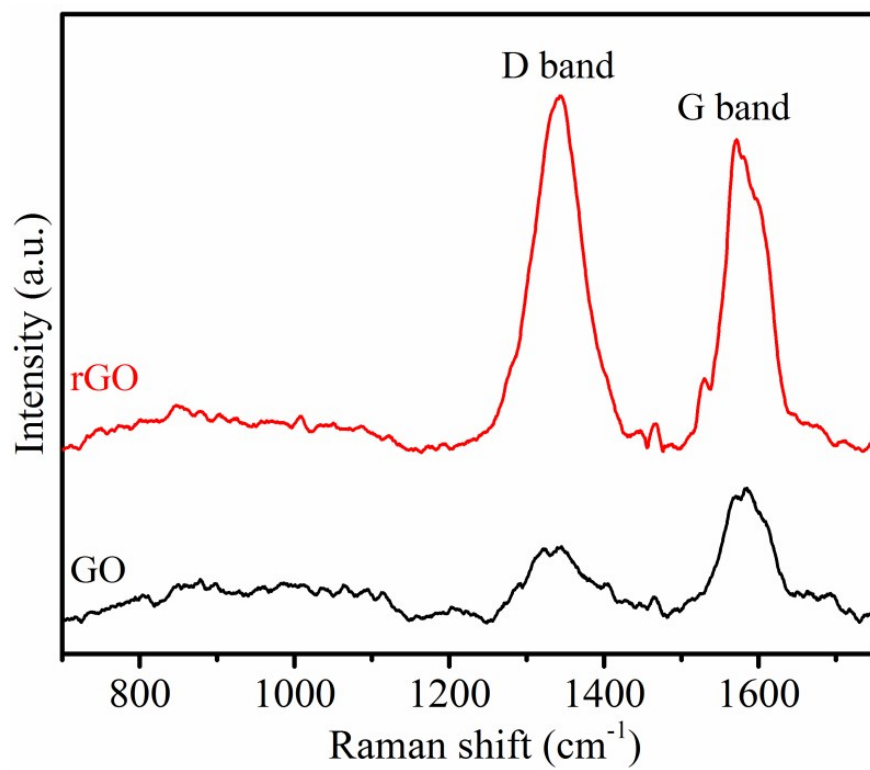

**Figure S2.** Raman Spectra of GO and rGO

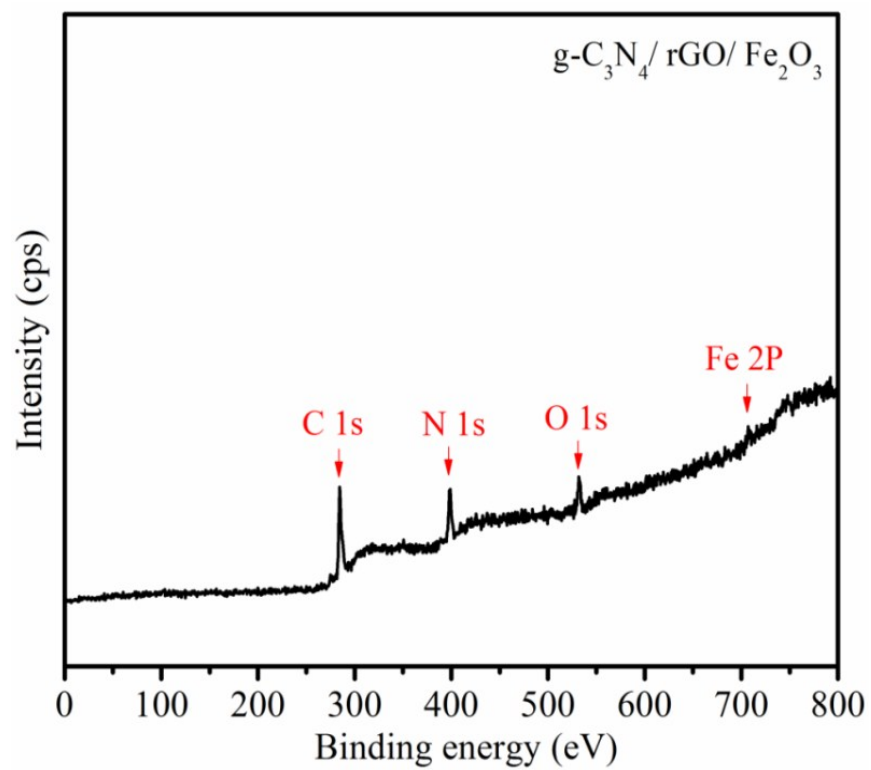

**Figure S3.** Photoemission survey scan spectra of g-C<sub>3</sub>N<sub>4</sub>/rGO/Fe<sub>2</sub>O<sub>3</sub>

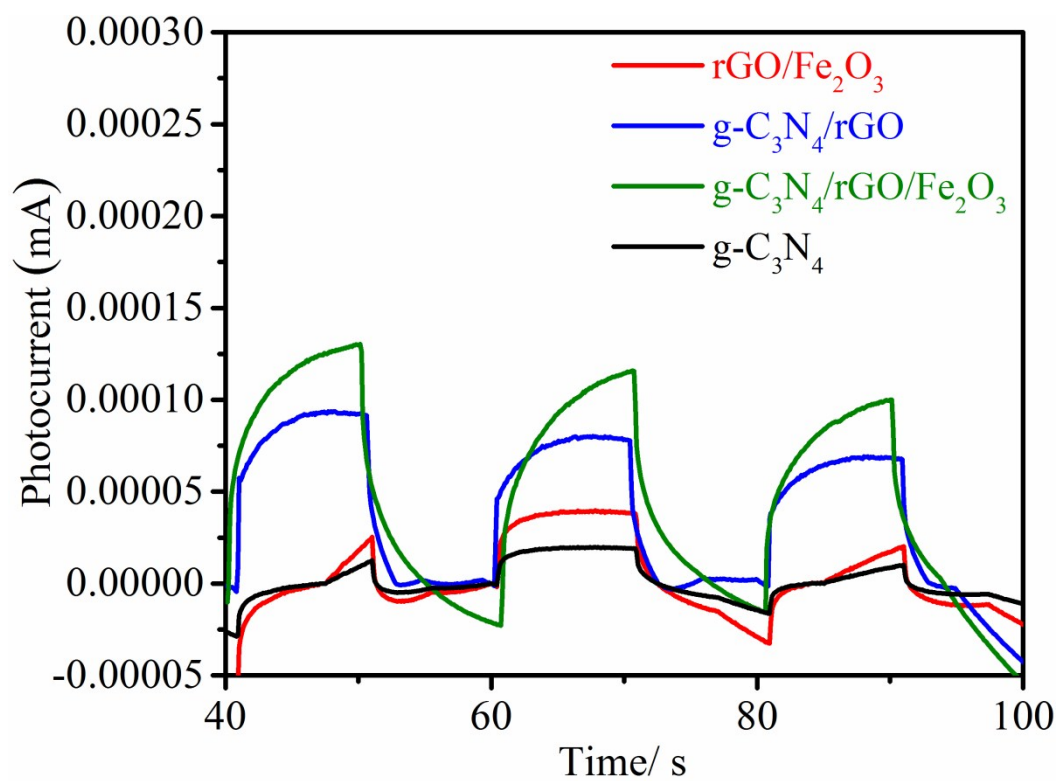

**Figure S4.** Transient photocurrent measurement of g-C<sub>3</sub>N<sub>4</sub>, g-C<sub>3</sub>N<sub>4</sub>/rGO, g-C<sub>3</sub>N<sub>4</sub>/rGO/Fe<sub>2</sub>O<sub>3</sub>, rGO/Fe<sub>2</sub>O<sub>3</sub>

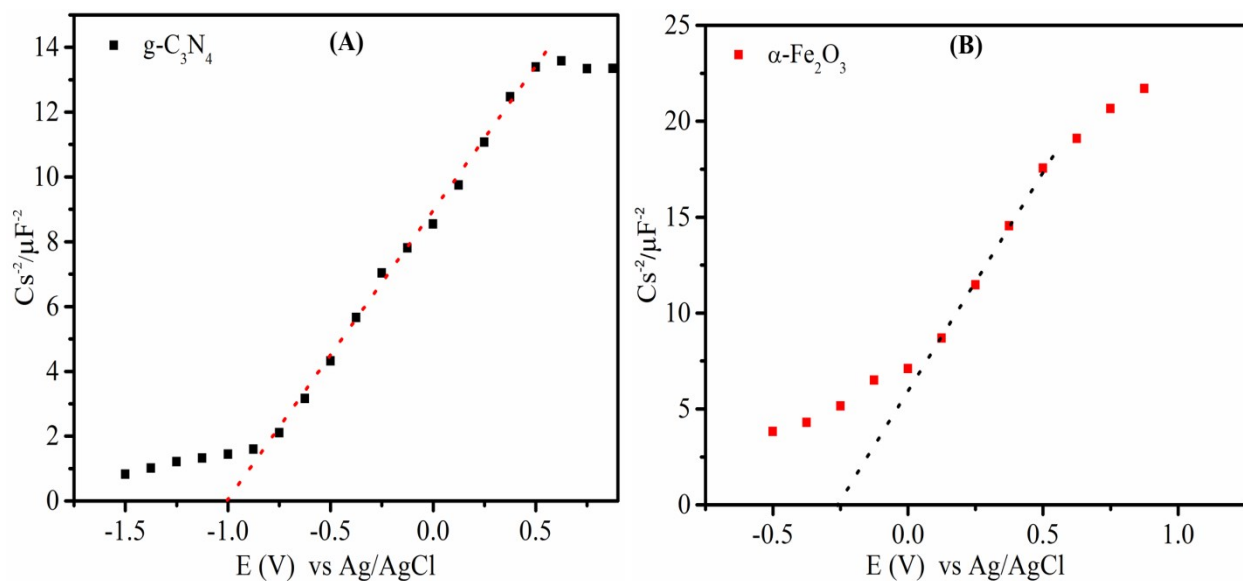

**Figure S5.** Mott-Schottky plot for (A) g-C<sub>3</sub>N<sub>4</sub> (B) Fe<sub>2</sub>O<sub>3</sub>

The Mott-Schottky analysis was performed to calculate the flat band potential of g-C<sub>3</sub>N<sub>4</sub> and Fe<sub>2</sub>O<sub>3</sub>. As shown in Fig. S5, both g-C<sub>3</sub>N<sub>4</sub> and Fe<sub>2</sub>O<sub>3</sub> exhibit n-type characteristics curves. The flat band potential of g-C<sub>3</sub>N<sub>4</sub> and Fe<sub>2</sub>O<sub>3</sub> was found to be -1.0 V and -0.25 V vs Ag/AgCl at pH 7 (equivalent to -1.19 V and -0.44 vs. NHE at pH 7).

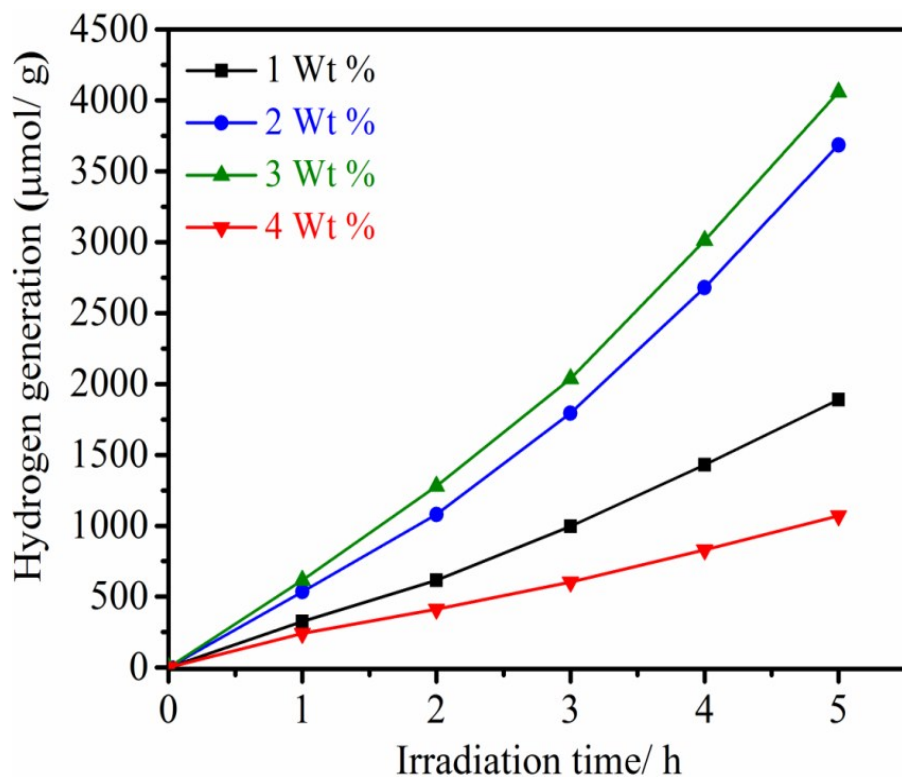

**Figure S6.** Photocatalytic activity of optimization of rGO on g-C<sub>3</sub>N<sub>4</sub>

**Table S1** Comparison of H<sub>2</sub> production efficiency of reported Pt loaded g-C<sub>3</sub>N<sub>4</sub> based composites and without Pt loaded g-C<sub>3</sub>N<sub>4</sub> composite catalysts (this work).

| Catalysts                                                            | Co-catalysts | Light Source         | Sacrificial agents     | H <sub>2</sub> Evolution Rate (μmol g <sup>-1</sup> h <sup>-1</sup> ) | Quantum Yield (%) | Ref.             |
|----------------------------------------------------------------------|--------------|----------------------|------------------------|-----------------------------------------------------------------------|-------------------|------------------|
| α-Fe <sub>2</sub> O <sub>3</sub> /2D-C <sub>3</sub> N <sub>4</sub>   | Pt           | 300 W Xe, λ > 400 nm | Triethanolamine (TEOA) | 31400                                                                 | 44.35 (420 nm)    | 21               |
| g-C <sub>3</sub> N <sub>4</sub> / zinc phthalocyanine                | Pt           | 350 W Xe, λ ≥ 420 nm | Ascorbic acid          | 12500                                                                 | 1.85 (700 nm)     | 55               |
| g-C <sub>3</sub> N <sub>4</sub> / PEDOT                              | Pt           | 300 W Xe, λ ≥ 420 nm | TEOA                   | 327                                                                   | NA                | 56               |
| g-C <sub>3</sub> N <sub>4</sub> / WO <sub>3</sub>                    | Pt           | 300 W Xe, λ ≥ 420 nm | TEOA                   | 110                                                                   | 0.9 (420 nm)      | 57               |
| g-C <sub>3</sub> N <sub>4</sub> / N-GQDs                             | Pt           | 300 W Xe, λ ≥ 420 nm | TEOA                   | 2180                                                                  | 5.25 (420 nm)     | 58               |
| g-C <sub>3</sub> N <sub>4</sub> /TiO <sub>2</sub>                    | Pt           | 300 W Xe, λ ≥ 420 nm | TEOA                   | 1780                                                                  | NA                | 12               |
| Nanospherical g-C <sub>3</sub> N <sub>4</sub>                        | Pt           | 300 W Xe, λ ≥ 420 nm | TEOA                   | 13675                                                                 | 9.6 (420 nm)      | 59               |
| B-doped C <sub>3</sub> N <sub>4</sub> Nanosheets                     | Pt           | 300 W Xe, λ ≥ 420 nm | TEOA                   | 5560                                                                  | NA                | 60               |
| Hollow C <sub>3</sub> N <sub>4</sub> Nanospheres                     | Pt           | 300 W Xe, λ > 420 nm | TEOA                   | 4480                                                                  | 7.5 (420 nm)      | 61               |
| C,N-TiO <sub>2</sub> /g-C <sub>3</sub> N <sub>4</sub>                | -            | 300 W Xe, λ > 420 nm | TEOA                   | 39                                                                    | NA                | 62               |
| <b>g-C<sub>3</sub>N<sub>4</sub>/ Fe<sub>2</sub>O<sub>3</sub>/rGO</b> | -            | <b>250 W Xe,</b>     | <b>TEOA</b>            | <b>6607</b>                                                           | <b>NA</b>         | <b>This work</b> |
